# Supplementary material for: Blue heteroleptic iridium(iii) complexes for OLEDs: simultaneous optimization of color purity and efficiency
Source: Royal Society of Chemistry journal article supplement (doi:10.1039/d2tc03463h), 2022-01-01
Supplement: d2tc03463h1.pdf [file d2tc03463h1.pdf]

## Supporting Information

For

### **Blue heteroleptic iridium(III) complexes for OLEDs: simultaneous optimization of color purity and efficiency**

Ying Lan,<sup>a</sup> Di Liu,<sup>a,b\*</sup> Jiuyan Li,<sup>a\*</sup> Yongqiang Mei,<sup>a</sup> Houru Tian<sup>a</sup>

<sup>a</sup> State Key Laboratory of Fine Chemicals, College of Chemical Engineering, Dalian  
University of Technology, 2 Linggong Road, Dalian, 116024, China.

E-mail: liudi@dlut.edu.cn, jiuyanli@dlut.edu.cn.

<sup>b</sup> State Key Laboratory of Luminescent Materials and Devices, South China University of  
Technology, Guangzhou, 510640, China.

### **Contents**

1. Experimental Section
2. Supplemental Tables and Figures
3. References

# 1. Experimental Section

## Synthesis of Ir(III) complexes

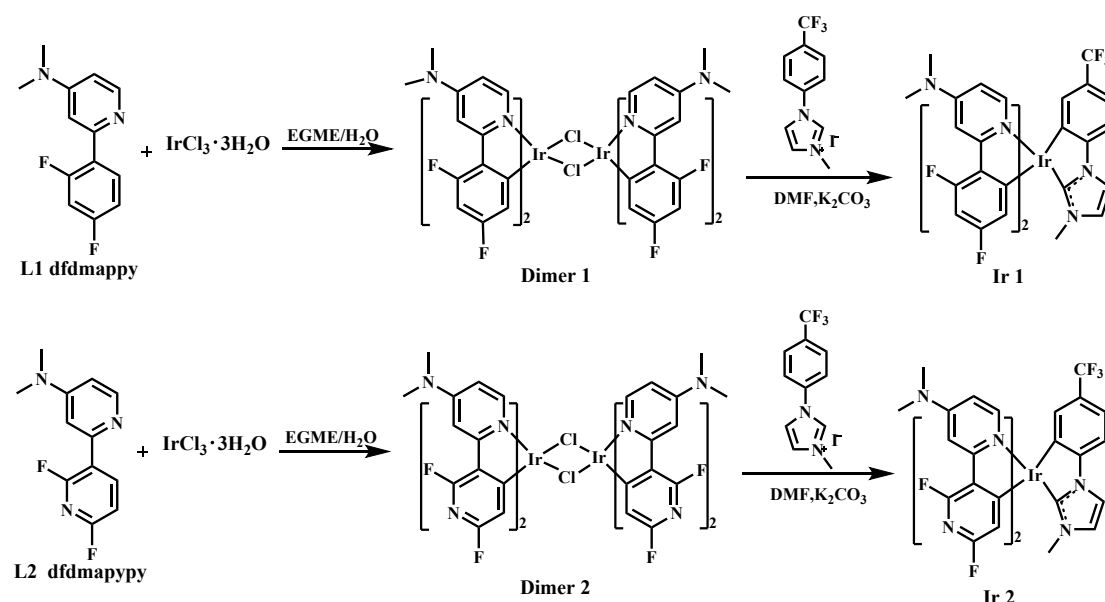

**Scheme S1.** Chemical structures and synthetic routes for **Ir1** and **Ir2**.

*Synthesis of iridium complexes Ir1 and Ir2.*  $\text{IrCl}_3 \cdot 3\text{H}_2\text{O}$  (0.24 mmol) and the cyclometalating ligand L1/L2 (0.52 mmol) was dissolved in 2-ethoxyethanol/ $\text{H}_2\text{O}$  (6/2 mL). The mixture was stirred in  $\text{N}_2$  atmosphere for 24 h at 110 °C. After cooling to room temperature, deionized water (20 mL) was added into the reaction mixture to get the yellow cyclometalated Ir(III)  $\mu$ -chlorobridged dimer precipitation. The precipitate was collected by filtration and washed with water. Without further purification, the dimer1/dimer2 (0.08 mmol), ancillary ligands L3 (0.22 mmol) and  $\text{K}_2\text{CO}_3$  (0.24 mmol) in DMF (8 mL) were heated at 100 °C for 12 h in  $\text{N}_2$  atmosphere. Finally the solvent was removed under reduced pressure and the residue was extracted with dichloromethane (50 mL). And the product was obtained by column chromatography on silica gel.

**Ir1:** yellow power, yield: 48%. <sup>1</sup>H-NMR (DMSO-*d*<sub>6</sub>, 400 MHz, δ[ppm]): 8.09 (s, 1H), 7.58 (d, *J* = 8.0 Hz, 1H), 7.41-7.22 (m, 5H), 7.18 (d, *J* = 8.0 Hz, 1H), 6.82 (s, 1H), 6.71-6.47 (m, 2H), 6.46-6.30 (m, 2H), 6.10 (d, *J* = 8.4 Hz, 1H), 5.81 (d, *J* = 8.4 Hz, 1H), 3.22-2.87 (m, 15H). HRMS (ESI, *m/z*) : 884.2044 (calc. 884.2049). Anal. Calcd for C<sub>37</sub>H<sub>30</sub>F<sub>7</sub>IrN<sub>6</sub>: C, 50.28; H, 3.42; N, 9.51. Anal. Found: C, 50.16; H, 3.46; N, 9.46.

**Ir2:** yellow power, yield: 35%. <sup>1</sup>H-NMR (DMSO-*d*<sub>6</sub>, 400 MHz, δ[ppm]): 8.15 (s, 1H), 7.65 (d, *J* = 7.6 Hz, 1H), 7.40-7.30 (m, 3H), 7.26 (d, *J* = 6.8 Hz, 3H), 6.76 (s, 1H), 6.54-6.40 (m, 2H), 6.12 (s, 1H), 5.81 (s, 1H), 3.22-2.95 (m, 15H). HRMS (ESI, *m/z*) : 886.1944 (calc. 886.1954). Anal. Calcd for C<sub>35</sub>H<sub>28</sub>F<sub>7</sub>IrN<sub>8</sub>: C, 47.45; H, 3.19; N, 12.65.

Anal. Found: C, 47.54; H, 3.22; N, 12.60.

## 2. Supplemental Tables and Figures

**Table S1** Related triplet states of complexes **Ir1** and **Ir2** calculated from the TD-DFT method.

| Complex       | State          | <i>E</i> [eV] | Dominant excitation                                   | character                                             |
|---------------|----------------|---------------|-------------------------------------------------------|-------------------------------------------------------|
| <b>Ir1</b>    | T <sub>1</sub> | 3.10          | H → L (35.2%), H-3 → L+1 (17.8%)<br>H-4 → L+1 (14.8%) | <sup>3</sup> MLCT/ <sup>3</sup> LLCT/ <sup>3</sup> LC |
|               | T <sub>2</sub> | 3.11          | H → L+1 (23.0%), H-3 → L (17.4%),<br>H → L+1 (10.0%)  | <sup>3</sup> MLCT/ <sup>3</sup> LLCT/ <sup>3</sup> LC |
| <b>Ir2</b>    | T <sub>1</sub> | 3.21          | H → L+1 (42.0%), H-3 → L+1 (25.1%)                    | <sup>3</sup> MLCT/ <sup>3</sup> LLCT/ <sup>3</sup> LC |
| <b>FIrpic</b> | T <sub>1</sub> | 2.91          | H-1 → L+2 (28.2%), H → L+2 (13.0%)<br>H → L (10.3%)   | <sup>3</sup> MLCT/ <sup>3</sup> LLCT/ <sup>3</sup> LC |

**Table S2** Surface distributions for HOMO/HOMO-3 and LUMO/LUMO+1 involved in the transitions for complexes Ir1 and Ir2. H and L denote HOMO and LUMO, respectively.

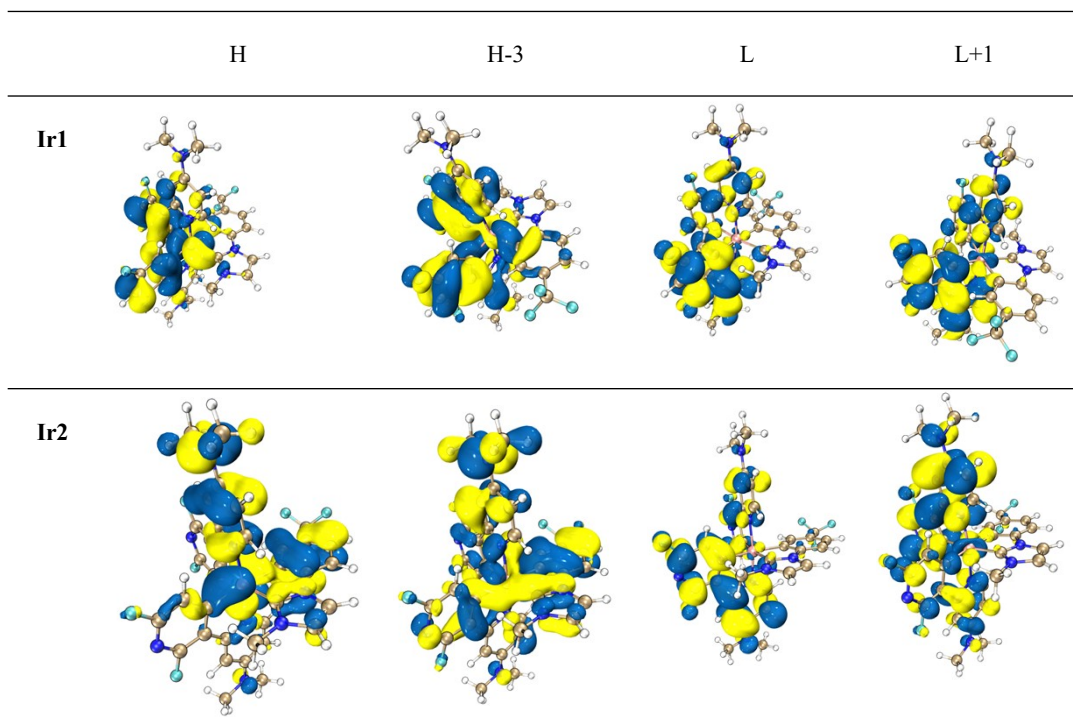

**Table S3** Calculated energies of the lowest triplet excited states ( $T_1$ ) for complexes Ir1 and Ir2.

| Complex | $\Delta E (T_1-S_0)$<br>[cm <sup>-1</sup> , nm] <sup>a</sup> |
|---------|--------------------------------------------------------------|
| Ir1     | 23529, 425                                                   |
| Ir2     | 23474, 426                                                   |

<sup>a</sup> Energy difference between the lowest triplet excited state ( $T_1$ ) and the ground state ( $S_0$ ) at the corresponding optimized geometries.

**Table S4** Comparison between the state-of-the-art blue OLEDs with CIE<sub>y</sub> around 0.2

known in literatures and the OLEDs of this work.

| Emitters                                         | □EL ( $\lambda_{\max}$ , nm) | EQE <sup>a</sup><br>[%] | CIE (x, y)          | Ref.             |
|--------------------------------------------------|------------------------------|-------------------------|---------------------|------------------|
| (dfpysipy) <sub>2</sub> Ir(pic)                  | -                            | 29.0/23.2               | (0.14, 0.19)        | 1                |
| (dfpysipy) <sub>2</sub> Ir(mpPic)                | -                            | 31.9/24.7               | (0.14, 0.19)        | 1                |
| (dfpysipy) <sub>2</sub> Ir(fptz)                 | -                            | 19.5/-                  | (0.15, 0.18)        | 1                |
| pic                                              | -                            | 15.5/-                  | (0.14, 0.18)        | 2                |
| bor                                              | -                            | 22.6/-                  | (0.15, 0.20)        | 2                |
| Ir(pep) <sub>3</sub>                             |                              | 7.6/-                   | (0.15, 0.19)        | 3                |
| Ir(pmp) <sub>3</sub>                             |                              | 10.8/-                  | (0.15, 0.19)        | 3                |
| Ir(Me-pep) <sub>3</sub>                          | 450                          | 15.2/-                  | (0.15, 0.19)        | 3                |
| [Ir(mimb)(pzpyOph <sup>F</sup> )]                | -                            | 19.7/-                  | (0.15, 0.24)        | 4                |
| [Ir(mimb)(pzpy <sup>Bu</sup> Oph <sup>F</sup> )] | -                            | 20.7/-                  | (0.15, 0.24)        | 4                |
| FCNIr                                            | 454                          | 20.4 / 11.9             | (0.14, 0.19)        | 5                |
| FCNIrpic                                         | -                            | 25.1/ 23.1              | (0.14, 0.18)        | 6                |
| Ir(dbfmi)                                        | -                            | 18.6/ 6.2               | (0.15, 0.19)        | 7                |
| (fpmi) <sub>2</sub> Ir(dmpypz)                   | 458                          | 17.1/ 15.1              | (0.13, 0.16)        | 8                |
| (mpmi) <sub>2</sub> Ir(dmpypz)                   | 464                          | 15.4/ 13.6              | (0.13, 0.18)        | 8                |
| [Ir(dfpyppy) <sub>2</sub> (POXD)]                | -                            | 6.0/-                   | (0.16, 0.20)        | 9                |
| m-IrS <sup>Me</sup>                              | 457                          | 17.1/-                  | (0.14, 0.19)        | 10               |
| TzIr                                             | 458                          | 27.8/24.4               | (0.144, 0.177)      | 11               |
| <b>Ir1</b>                                       | <b>462</b>                   | <b>28.0/20.8</b>        | <b>(0.16, 0.21)</b> | <b>This work</b> |
| <b>Ir2</b>                                       | <b>465</b>                   | <b>16.4/12.9</b>        | <b>(0.16, 0.20)</b> | <b>This work</b> |

<sup>a</sup> Values are given in the order of maximum and then at 1000 cd m<sup>-2</sup>.

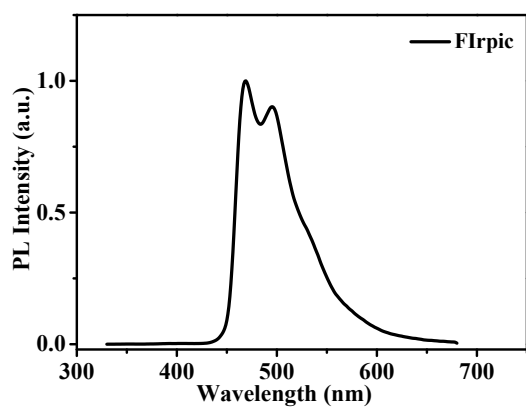

**Fig. S1** PL spectra of complexes **FIrpic** in  $\text{CH}_2\text{Cl}_2$  solution ( $10^{-5}$  mol  $\text{L}^{-1}$ ) at RT.

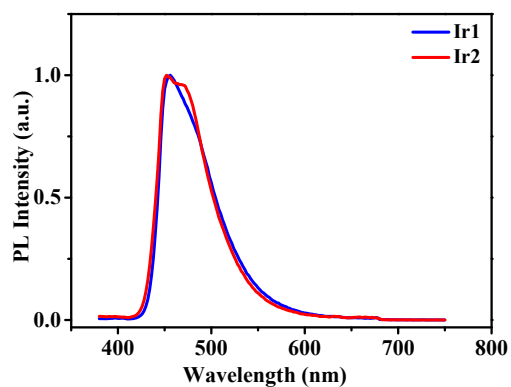

**Fig. S2** PL spectra of **Ir1** and **Ir2** in the 5 wt % doped PPF films.

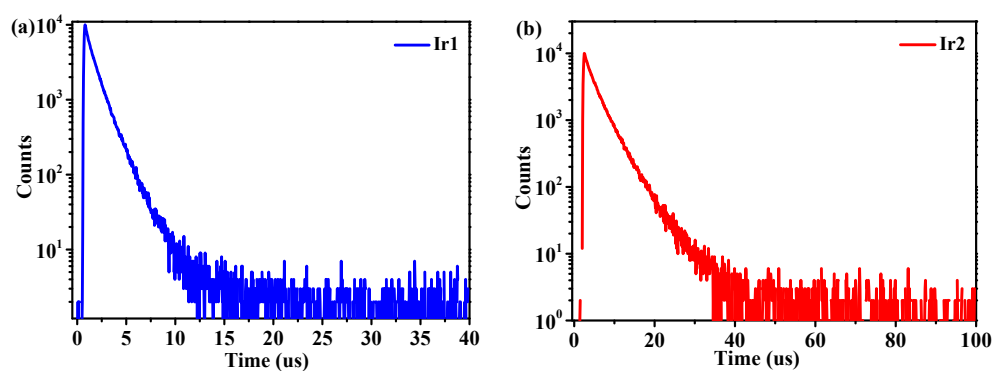

**Fig. S3** Transient PL decay curves of **Ir1** and **Ir2** in 5 wt% doped PPF films. (excited at 380 nm).

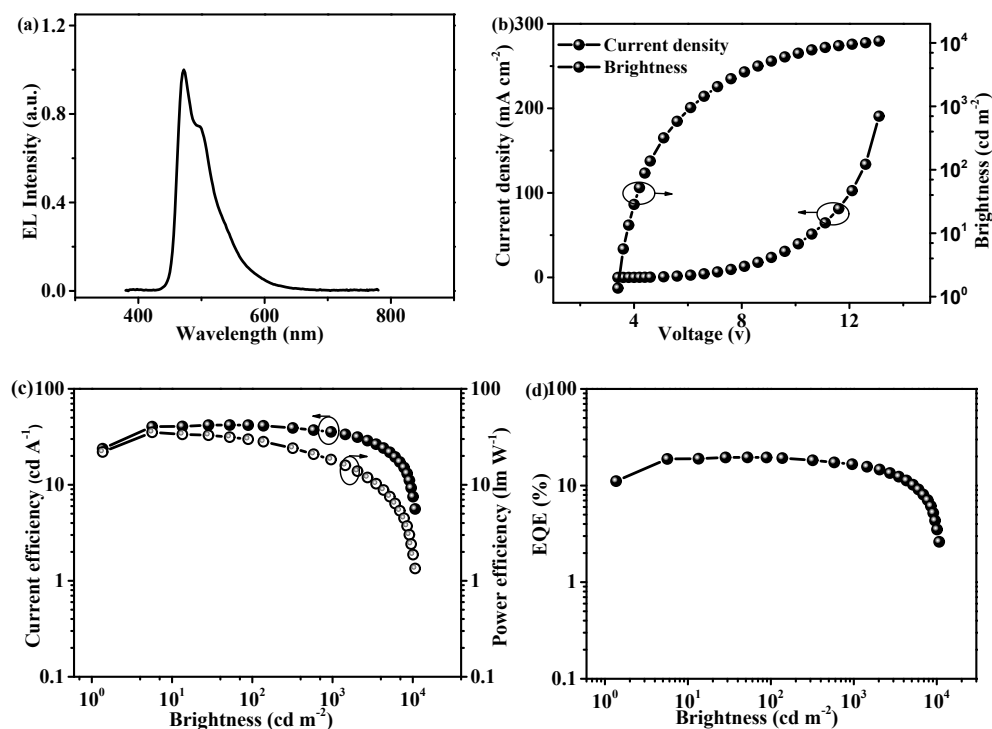

**Fig. S4** The performance of the reference device based on FIrpc: (a) EL spectra (b) current density-voltage-brightness ( $J-V-B$ ) characteristics and (c) CE and PE vs luminance curves and (d) EQE-luminance curves.

### 3. References

- 1 H. Shin, Y. H. Ha, H. G. Kim, R. Kim, S. K. Kwon, Y. H. Kim and J. J. Kim, *Adv Mater*, 2019, **31**, e1808102.
- 2 Y.-J. Cho, S.-Y. Kim, J.-H. Kim, D. W. Crandell, M.-H. Baik, J. Lee, C. H. Kim, H.-J. Son, W.-S. Han and S. O. Kang, *J. Mater. Chem. C*, 2017, **5**, 4480-4487.
- 3 Z. Chen, L. Wang, S. Su, X. Zheng, N. Zhu, C. L. Ho, S. Chen and W. Y. Wong, *ACS Appl. Mater. Interfaces*, 2017, **9**, 40497-40502.
- 4 H. H. Kuo, Y. T. Chen, L. R. Devereux, C. C. Wu, M. A. Fox, C. Y. Kuei, Y. Chi and G. H. Lee, *Adv Mater*, 2017, **29**.

- 5 H. S. Son and J. Y. Lee, *Org. Electron.*, 2011, **12**, 1025-1032.
- 6 S. O. Jeon, S. E. Jang, H. S. Son and J. Y. Lee, *Adv Mater*, 2011, **23**, 1436-1441.
- 7 H. Sasabe, J. Takamatsu, T. Motoyama, S. Watanabe, G. Wagenblast, N. Langer, O. Molt, E. Fuchs, C. Lennartz and J. Kido, *Adv Mater*, 2010, **22**, 5003-5007.
- 8 K. Y. Lu, H. H. Chou, C. H. Hsieh, Y. H. Yang, H. R. Tsai, H. Y. Tsai, L. C. Hsu, C. Y. Chen, I. C. Chen and C. H. Cheng, *Adv Mater*, 2011, **23**, 4933-4937.
- 9 W. Qu, F. Zhang, S. Liu, D. Wei, X. Dong, B. Yu, W. Lu, C. Zhang, S. Li, Z. Li, B. Wei, B. Zhai and G. Cao, *Dyes Pigm.*, 2017, **145**, 116-125.
- 10 B.-S. Yun, S.-Y. Kim, J.-H. Kim, H.-J. Son and S. O. Kang, *J. Mater. Chem. C*, 2021, **9**, 4062-4069.
- 11 C. H. Ryu, J. Lim, M. B. Kim, J. H. Lee, H. Hwang, J. Y. Lee and K. M. Lee, *Adv. Opt. Mater.*, 2021, **9**, 2001957.
